# Supplementary material
Source: publisher figshare collection journal article supplement (https://future-science-group.figshare.com/ndownloader/files/28839030)
Supplement: Supplementary file 1 [file 28839030]

**Licochalcone A-loaded solid lipid nanoparticles improve antischistosomal activity *in vitro* and *in vivo***

**Supplementary Methods:** GC-MS analysis of cupuaçu (*Theobroma grandiflorum*) butter

The cupuaçu (*Theobroma grandiflorum*) butterwas analyzed by GC/MS analysis using a Shimadzu QP2010 Plus (Shimadzu Corporation, Kyoto, Japan) system equipped with an AOC-20i autosampler and a Restek Rtx-5MS fused-silica capillary column (5% phenyl-, 95% methylpolysiloxane; 30 m x 0.25 mm i.d., film thickness 0.25 μm) [1]. The oven temperature was programmed to increase from 60 oC to 240 oC at 3 oC/min; injector temperature, 150 oC; ion-source temperature, 260 oC; carrier gas, He (1.0 ml/min); split ratio, 1:10; injection volume, 0.1 μL. The mass spectrometer was operated in the electron ionization mode (70 eV), and the spectra were taken with a scan interval of 0.5 s over the mass range 40-600 Da. The quantification of each TV-EO constituent was done by internal normalization (%). The identification of the cupuaçu (*Theobroma grandiflorum*) butter components was based on mass spectra with those of the *Wiley 7*, *NIST 08*, and *FFNSC 1.2* spectral libraries [1].

1. Godinho LS, Carvalho LSA, Castro CCB *et al.* Anthelmintic activity of crude extract and essential oil of *Tanacetum vulgare* (Asteraceae) against adult worms of *Schistosoma mansoni*. *Sci. World J*. 2014, 460342 (2014).
